# Supplementary material
Source: MDPI journal article supplement (https://www.mdpi.com/2304-6740/6/4/108)
Supplement: s1 [file s1]

Archive with 2 entries (2 files):
- C6Cs2LiN9.cif
- C6Cs2LiN9_checkcif.pdf
