# Supplementary material
Source: MDPI journal article supplement (https://www.mdpi.com/2304-6740/6/4/108)
Supplement: s1 [file s1 › C6Cs2LiN9.cif]

#=======================================================================
data_global
#=======================================================================

_audit_creation_method                   'Jana2006 Version : 25/10/2015'


# 1. PROCESSING SUMMARY (IUCr Office Use Only)

_journal_date_recd_electronic            ?
_journal_date_to_coeditor                ?
_journal_date_from_coeditor              ?
_journal_date_accepted                   ?
_journal_date_printers_first             ?
_journal_date_printers_final             ?
_journal_date_proofs_out                 ?
_journal_date_proofs_in                  ?
_journal_coeditor_name                   ?
_journal_coeditor_code                   ?
_journal_coeditor_notes
; ?
;
_journal_techeditor_code                 ?
_journal_paper_category                  ?
_journal_techeditor_notes
; ?
;
_journal_coden_ASTM                      ?
_journal_name_full                       'Acta Crystallographica Section C'
_journal_year                            ?
_journal_volume                          ?
_journal_issue                           ?
_journal_page_first                      ?
_journal_page_last                       ?
_journal_suppl_publ_number               ?
_journal_suppl_publ_pages                ?

#=======================================================================

# 2. SUBMISSION DETAILS

_publ_contact_author_name                ?
_publ_contact_author_address
; ?
;
_publ_contact_author_email               ?
_publ_contact_author_fax                 ?
_publ_contact_author_phone               ?

_publ_requested_journal                  'Acta Crystallographica Section C'
_publ_requested_category                 ?

_publ_contact_letter
; ?
;

#=======================================================================

# 3. TITLE AND AUTHOR LIST

_publ_section_title
; ?
;
_publ_section_title_footnote
; ?
;
loop_
 _publ_author_name
 _publ_author_footnote
 _publ_author_address
; ?      # name
;
; ?      # footnote
;
; ?      # address
;

#=======================================================================

# 4. TEXT

_publ_section_synopsis
; ?
;
_publ_section_abstract
; ?
;
_publ_section_comment
; ?
;
_publ_section_introduction
; ?
;
_publ_section_experimental
; ?
;
_publ_section_exptl_prep
; ?
;
_publ_section_exptl_refinement
; ?
;
_publ_section_exptl_solution
; ?
;
_publ_section_discussion
; ?
;
_publ_section_acknowledgements
; ?
;
_publ_section_references
;
Petricek, V., Dusek, M. & Palatinus L. (2014). Z. Kristallogr. 229(5), 345-352.

Palatinus L. & Chapuis G. (2007). J. Appl. Cryst. 40, 786-790.

;
_publ_section_figure_captions
; ?
;
_publ_section_table_legends
; ?
;

#=======================================================================
data_I
#=======================================================================

# 5. CHEMICAL DATA

_chemical_name_common                   'Lithium cesium dicyanamide'
_chemical_name_systematic 				'Lithium di-cesium tris-dicyanamide'
_chemical_formula_moiety                 '3(C2 N3), 2(Cs), Li'
_chemical_formula_structural             'Li Cs2 (N (C N)2)3'
_chemical_formula_sum                    'C6 Cs2 Li1 N9'
_chemical_formula_weight                 470.91
_chemical_absolute_configuration         .

#=======================================================================

# 6. CRYSTAL DATA

_symmetry_cell_setting                   hexagonal
_symmetry_space_group_name_H-M           'P 63/m'
_symmetry_space_group_name_Hall          '-P 6c'
_symmetry_Int_Tables_number              176

loop_
 _space_group_symop_id
 _space_group_symop_operation_xyz
 1   x,y,z
 2   -y,x-y,z
 3   -x+y,-x,z
 4   -x,-y,z+1/2
 5   y,-x+y,z+1/2
 6   x-y,x,z+1/2
 7   -x,-y,-z
 8   y,-x+y,-z
 9   x-y,x,-z
 10  x,y,-z+1/2
 11  -y,x-y,-z+1/2
 12  -x+y,-x,-z+1/2

_cell_length_a                           6.8480(4)
_cell_length_b                           6.8480(4)
_cell_length_c                           14.1665(17)
_cell_angle_alpha                        90
_cell_angle_beta                         90
_cell_angle_gamma                        120
_cell_volume                             575.33(8)


_cell_formula_units_Z                    2

_cell_measurement_reflns_used            4655
_cell_measurement_theta_min              2.88
_cell_measurement_theta_max              31.08
_cell_measurement_temperature            100
_cell_special_details
; ?
;

_exptl_crystal_density_diffrn            2.7181
_exptl_crystal_density_method            'not measured'
_exptl_crystal_F_000                     424

_exptl_absorpt_coefficient_mu            6.329
_exptl_crystal_description               'colorless block'
_exptl_crystal_size_max                  0.03
_exptl_crystal_size_mid                  0.02
_exptl_crystal_size_min                  0.02
_exptl_crystal_colour                    'colorless'
_exptl_absorpt_correction_type           'multi-scan'
_exptl_absorpt_process_details           'SADABS V2014/5 (Bruker AXS Inc.)'
_exptl_absorpt_correction_T_min          0.5361
_exptl_absorpt_correction_T_max          0.7461


#=======================================================================

# 7. EXPERIMENTAL DATA

_diffrn_ambient_temperature              100
_diffrn_radiation_type                   'Mo K\a'
_diffrn_radiation_source                 'Incoatec microsource'
_diffrn_radiation_wavelength             0.71073
_diffrn_radiation_monochromator          'multilayer optics'
_diffrn_measurement_device_type          'Bruker D8 gonimeter with APEX CCD detector'
_diffrn_measurement_method               '\w scans'

_diffrn_reflns_number                    4655
_diffrn_reflns_theta_min                 2.88
_diffrn_reflns_theta_max                 31.08
_diffrn_reflns_theta_full                30.61
_diffrn_measured_fraction_theta_max      0.96
_diffrn_measured_fraction_theta_full     0.98
_diffrn_reflns_av_R_equivalents          0.0269 
_diffrn_reflns_av_unetI/netI             0.0167
_diffrn_reflns_limit_h_min               -9
_diffrn_reflns_limit_h_max               9
_diffrn_reflns_limit_k_min               -9
_diffrn_reflns_limit_k_max               8
_diffrn_reflns_limit_l_min               -17
_diffrn_reflns_limit_l_max               19

_diffrn_radiation_probe                  X-ray

#=======================================================================

# 8. REFINEMENT DATA

_refine_special_details
; ?
;

_reflns_number_total                     617
_reflns_number_gt                        528
_reflns_threshold_expression             'I>3\s(I)'

_refine_ls_structure_factor_coef         Fsqd
_refine_ls_R_factor_gt                   0.0133
_refine_ls_wR_factor_gt                  0.0315
_refine_ls_R_factor_all                  0.0179
_refine_ls_wR_factor_ref                 0.0330
_refine_ls_goodness_of_fit_ref           1.03
_refine_ls_goodness_of_fit_gt            1.07
_refine_ls_number_reflns                 617
_refine_ls_number_parameters             30
_refine_ls_number_restraints             0
_refine_ls_number_constraints            0
_refine_ls_weighting_scheme              sigma
_refine_ls_weighting_details             'w=1/(\s^2^(I)+0.0004I^2^)'
_refine_ls_shift/su_max                  0.0113
_refine_ls_shift/su_mean                 0.0012
_refine_diff_density_max                 0.31
_refine_diff_density_min                 -0.34
_refine_ls_extinction_method             'none'
_refine_ls_abs_structure_Flack           .

loop_
 _atom_type_symbol
 _atom_type_scat_dispersion_real
 _atom_type_scat_dispersion_imag
 _atom_type_scat_source
 C    0.0033  0.0016
 'International Tables Vol C tables 4.2.6.8 and 6.1.1.1'
 Cs  -0.3680  2.1192
 'International Tables Vol C tables 4.2.6.8 and 6.1.1.1'
 Li  -0.0003  0.0001
 'International Tables Vol C tables 4.2.6.8 and 6.1.1.1'
 N    0.0061  0.0033
 'International Tables Vol C tables 4.2.6.8 and 6.1.1.1'


#=======================================================================

# 9. ATOMIC COORDINATES AND DISPLACEMENT PARAMETERS

loop_
 _atom_site_label
 _atom_site_type_symbol
 _atom_site_fract_x
 _atom_site_fract_y
 _atom_site_fract_z
 _atom_site_adp_type
 _atom_site_U_iso_or_equiv
 _atom_site_site_symmetry_multiplicity
 _atom_site_occupancy
 _atom_site_calc_flag
 _atom_site_refinement_flags
 _atom_site_disorder_assembly
 _atom_site_disorder_group
  Cs1 Cs 0.333333 0.666667 0.078375(12) Uani 0.00920(6) 4 1 d . . .
  N1 N 0.3590(4) 0.3077(4) 0.25 Uani 0.0155(9) 6 1 d . . .
  N2 N 0.3115(2) 0.1284(2) 0.09385(11) Uani 0.0122(6) 12 1 d . . .
  C1 C 0.3333(3) 0.2014(3) 0.16978(12) Uani 0.0098(6) 12 1 d . . .
  Li1 Li 0 0 0 Uani 0.0144(17) 2 1 d . . .

loop_
 _atom_site_aniso_label
 _atom_site_aniso_type_symbol
 _atom_site_aniso_U_11
 _atom_site_aniso_U_22
 _atom_site_aniso_U_33
 _atom_site_aniso_U_12
 _atom_site_aniso_U_13
 _atom_site_aniso_U_23
 Cs1 Cs 0.00892(8) 0.00892(8) 0.00975(10) 0.00446(4) 0 0
 N1 N 0.0245(11) 0.0113(10) 0.0101(9) 0.0084(10) 0 0
 N2 N 0.0134(7) 0.0122(7) 0.0107(7) 0.0062(6) 0.0005(5) 0.0017(5)
 C1 C 0.0089(7) 0.0086(7) 0.0128(8) 0.0050(6) 0.0006(6) 0.0033(6)
 Li1 Li 0.016(2) 0.016(2) 0.010(3) 0.0082(10) 0 0


#=======================================================================

# 10. MOLECULAR GEOMETRY


loop_
 _geom_bond_atom_site_label_1
 _geom_bond_atom_site_label_2
 _geom_bond_site_symmetry_1
 _geom_bond_site_symmetry_2
 _geom_bond_distance
 _geom_bond_publ_flag
 
  Cs1 Cs1 . 7_565 4.5346(6) ?
  Cs1 Cs1 . 7_665 4.5346(4) ?
  Cs1 Cs1 . 7_675 4.5346(6) ?
  Cs1 Cs1 . 10_555 4.8627(12) ?
  Cs1 N1 . . 3.524(2) ?
  Cs1 N1 . 2_665 3.5240(17) ?
  Cs1 N1 . 3_565 3.524(3) ?
  Cs1 N2 . . 3.6202(19) ?
  Cs1 N2 . 1_565 3.247(2) ?
  Cs1 N2 . 2_555 3.2468(16) ?
  Cs1 N2 . 2_665 3.6202(16) ?
  Cs1 N2 . 3_565 3.620(3) ?
  Cs1 N2 . 3_665 3.247(3) ?
  Cs1 N2 . 7_665 3.2287(15) ?
  Cs1 N2 . 8_565 3.229(2) ?
  Cs1 N2 . 9_555 3.2287(16) ?
  Cs1 C1 . . 3.439(2) ?
  Cs1 C1 . 2_665 3.4389(17) ?
  Cs1 C1 . 3_565 3.439(3) ?
  Cs1 Li1 . . 4.1066(6) ?
  Cs1 Li1 . 1_565 4.1066(2) ?
  Cs1 Li1 . 1_665 4.1066(6) ?
  N1 C1 . . 1.313(2) ?
  N1 C1 . 10_555 1.313(2) ?
  N2 C1 . . 1.164(2) ?
  N2 Li1 . . 2.2837(16) ?
 
loop_
 _geom_angle_atom_site_label_1
 _geom_angle_atom_site_label_2
 _geom_angle_atom_site_label_3
 _geom_angle_site_symmetry_1
 _geom_angle_site_symmetry_2
 _geom_angle_site_symmetry_3
 _geom_angle
 _geom_angle_publ_flag
  Cs1 Cs1 Cs1 7_565 . 7_665 98.065(6) ?
  Cs1 Cs1 Cs1 7_565 . 7_675 98.065(7) ?
  Cs1 Cs1 Cs1 7_565 . 10_555 119.321(4) ?
  Cs1 Cs1 N1 7_565 . . 112.06(3) ?
  Cs1 Cs1 N1 7_565 . 2_665 149.84(5) ?
  Cs1 Cs1 N1 7_565 . 3_565 76.90(4) ?
  Cs1 Cs1 N2 7_565 . . 89.91(2) ?
  Cs1 Cs1 N2 7_565 . 1_565 89.90(3) ?
  Cs1 Cs1 N2 7_565 . 2_555 45.39(4) ?
  Cs1 Cs1 N2 7_565 . 2_665 142.98(3) ?
  Cs1 Cs1 N2 7_565 . 3_565 44.93(2) ?
  Cs1 Cs1 N2 7_565 . 3_665 143.44(3) ?
  Cs1 Cs1 N2 7_565 . 7_665 101.47(3) ?
  Cs1 Cs1 N2 7_565 . 8_565 45.71(3) ?
  Cs1 Cs1 N2 7_565 . 9_555 52.36(4) ?
  Cs1 Cs1 C1 7_565 . . 100.62(3) ?
  Cs1 Cs1 C1 7_565 . 2_665 152.12(4) ?
  Cs1 Cs1 C1 7_565 . 3_565 59.00(3) ?
  Cs1 Cs1 Li1 7_565 . . 56.488(3) ?
  Cs1 Cs1 Li1 7_565 . 1_565 56.488(4) ?
  Cs1 Cs1 Li1 7_565 . 1_665 134.993(7) ?
  Cs1 Cs1 Cs1 7_665 . 7_675 98.065(6) ?
  Cs1 Cs1 Cs1 7_665 . 10_555 119.321(4) ?
  Cs1 Cs1 N1 7_665 . . 76.90(4) ?
  Cs1 Cs1 N1 7_665 . 2_665 112.06(5) ?
  Cs1 Cs1 N1 7_665 . 3_565 149.84(4) ?
  Cs1 Cs1 N2 7_665 . . 44.93(2) ?
  Cs1 Cs1 N2 7_665 . 1_565 143.44(3) ?
  Cs1 Cs1 N2 7_665 . 2_555 89.90(4) ?
  Cs1 Cs1 N2 7_665 . 2_665 89.91(4) ?
  Cs1 Cs1 N2 7_665 . 3_565 142.98(2) ?
  Cs1 Cs1 N2 7_665 . 3_665 45.39(3) ?
  Cs1 Cs1 N2 7_665 . 7_665 52.36(3) ?
  Cs1 Cs1 N2 7_665 . 8_565 101.47(4) ?
  Cs1 Cs1 N2 7_665 . 9_555 45.71(4) ?
  Cs1 Cs1 C1 7_665 . . 59.00(3) ?
  Cs1 Cs1 C1 7_665 . 2_665 100.62(4) ?
  Cs1 Cs1 C1 7_665 . 3_565 152.12(3) ?
  Cs1 Cs1 Li1 7_665 . . 56.488(4) ?
  Cs1 Cs1 Li1 7_665 . 1_565 134.993(7) ?
  Cs1 Cs1 Li1 7_665 . 1_665 56.488(4) ?
  Cs1 Cs1 Cs1 7_675 . 10_555 119.321(4) ?
  Cs1 Cs1 N1 7_675 . . 149.84(3) ?
  Cs1 Cs1 N1 7_675 . 2_665 76.90(4) ?
  Cs1 Cs1 N1 7_675 . 3_565 112.06(4) ?
  Cs1 Cs1 N2 7_675 . . 142.98(2) ?
  Cs1 Cs1 N2 7_675 . 1_565 45.39(3) ?
  Cs1 Cs1 N2 7_675 . 2_555 143.44(4) ?
  Cs1 Cs1 N2 7_675 . 2_665 44.93(3) ?
  Cs1 Cs1 N2 7_675 . 3_565 89.91(2) ?
  Cs1 Cs1 N2 7_675 . 3_665 89.90(3) ?
  Cs1 Cs1 N2 7_675 . 7_665 45.71(3) ?
  Cs1 Cs1 N2 7_675 . 8_565 52.36(3) ?
  Cs1 Cs1 N2 7_675 . 9_555 101.47(3) ?
  Cs1 Cs1 C1 7_675 . . 152.12(3) ?
  Cs1 Cs1 C1 7_675 . 2_665 59.00(4) ?
  Cs1 Cs1 C1 7_675 . 3_565 100.62(3) ?
  Cs1 Cs1 Li1 7_675 . . 134.993(7) ?
  Cs1 Cs1 Li1 7_675 . 1_565 56.488(4) ?
  Cs1 Cs1 Li1 7_675 . 1_665 56.488(3) ?
  Cs1 Cs1 N1 10_555 . . 46.38(3) ?
  Cs1 Cs1 N1 10_555 . 2_665 46.38(3) ?
  Cs1 Cs1 N1 10_555 . 3_565 46.38(4) ?
  Cs1 Cs1 N2 10_555 . . 86.53(2) ?
  Cs1 Cs1 N2 10_555 . 1_565 86.13(3) ?
  Cs1 Cs1 N2 10_555 . 2_555 86.13(3) ?
  Cs1 Cs1 N2 10_555 . 2_665 86.53(2) ?
  Cs1 Cs1 N2 10_555 . 3_565 86.53(2) ?
  Cs1 Cs1 N2 10_555 . 3_665 86.13(3) ?
  Cs1 Cs1 N2 10_555 . 7_665 139.08(3) ?
  Cs1 Cs1 N2 10_555 . 8_565 139.08(4) ?
  Cs1 Cs1 N2 10_555 . 9_555 139.08(3) ?
  Cs1 Cs1 C1 10_555 . . 67.88(3) ?
  Cs1 Cs1 C1 10_555 . 2_665 67.88(3) ?
  Cs1 Cs1 C1 10_555 . 3_565 67.88(3) ?
  Cs1 Cs1 Li1 10_555 . . 105.686(3) ?
  Cs1 Cs1 Li1 10_555 . 1_565 105.686(3) ?
  Cs1 Cs1 Li1 10_555 . 1_665 105.686(3) ?
  N1 Cs1 N1 . . 2_665 77.64(6) ?
  N1 Cs1 N1 . . 3_565 77.64(6) ?
  N1 Cs1 N2 . . . 40.45(4) ?
  N1 Cs1 N2 . . 1_565 132.49(4) ?
  N1 Cs1 N2 . . 2_555 66.72(5) ?
  N1 Cs1 N2 . . 2_665 104.96(5) ?
  N1 Cs1 N2 . . 3_565 112.18(5) ?
  N1 Cs1 N2 . . 3_665 65.17(5) ?
  N1 Cs1 N2 . . 7_665 122.35(5) ?
  N1 Cs1 N2 . . 8_565 157.66(4) ?
  N1 Cs1 N2 . . 9_555 95.97(4) ?
  N1 Cs1 C1 . . . 21.69(4) ?
  N1 Cs1 C1 . . 2_665 92.30(5) ?
  N1 Cs1 C1 . . 3_565 96.30(5) ?
  N1 Cs1 Li1 . . . 66.73(3) ?
  N1 Cs1 Li1 . . 1_565 144.08(4) ?
  N1 Cs1 Li1 . . 1_665 98.33(4) ?
  N1 Cs1 N1 2_665 . 3_565 77.64(5) ?
  N1 Cs1 N2 2_665 . . 112.18(6) ?
  N1 Cs1 N2 2_665 . 1_565 65.17(7) ?
  N1 Cs1 N2 2_665 . 2_555 132.49(4) ?
  N1 Cs1 N2 2_665 . 2_665 40.45(3) ?
  N1 Cs1 N2 2_665 . 3_565 104.96(6) ?
  N1 Cs1 N2 2_665 . 3_665 66.72(6) ?
  N1 Cs1 N2 2_665 . 7_665 95.97(3) ?
  N1 Cs1 N2 2_665 . 8_565 122.35(7) ?
  N1 Cs1 N2 2_665 . 9_555 157.66(7) ?
  N1 Cs1 C1 2_665 . . 96.30(6) ?
  N1 Cs1 C1 2_665 . 2_665 21.69(4) ?
  N1 Cs1 C1 2_665 . 3_565 92.30(5) ?
  N1 Cs1 Li1 2_665 . . 144.08(5) ?
  N1 Cs1 Li1 2_665 . 1_565 98.33(6) ?
  N1 Cs1 Li1 2_665 . 1_665 66.73(3) ?
  N1 Cs1 N2 3_565 . . 104.96(5) ?
  N1 Cs1 N2 3_565 . 1_565 66.72(5) ?
  N1 Cs1 N2 3_565 . 2_555 65.17(5) ?
  N1 Cs1 N2 3_565 . 2_665 112.18(5) ?
  N1 Cs1 N2 3_565 . 3_565 40.45(5) ?
  N1 Cs1 N2 3_565 . 3_665 132.49(5) ?
  N1 Cs1 N2 3_565 . 7_665 157.66(6) ?
  N1 Cs1 N2 3_565 . 8_565 95.97(6) ?
  N1 Cs1 N2 3_565 . 9_555 122.35(5) ?
  N1 Cs1 C1 3_565 . . 92.30(6) ?
  N1 Cs1 C1 3_565 . 2_665 96.30(5) ?
  N1 Cs1 C1 3_565 . 3_565 21.69(5) ?
  N1 Cs1 Li1 3_565 . . 98.33(4) ?
  N1 Cs1 Li1 3_565 . 1_565 66.73(5) ?
  N1 Cs1 Li1 3_565 . 1_665 144.08(3) ?
  N2 Cs1 N2 . . 1_565 171.47(4) ?
  N2 Cs1 N2 . . 2_555 55.53(5) ?
  N2 Cs1 N2 . . 2_665 119.64(5) ?
  N2 Cs1 N2 . . 3_565 119.64(3) ?
  N2 Cs1 N2 . . 3_665 64.20(4) ?
  N2 Cs1 N2 . . 7_665 97.29(4) ?
  N2 Cs1 N2 . . 8_565 124.54(4) ?
  N2 Cs1 N2 . . 9_555 56.18(4) ?
  N2 Cs1 C1 . . . 18.75(4) ?
  N2 Cs1 C1 . . 2_665 117.90(5) ?
  N2 Cs1 C1 . . 3_565 114.25(4) ?
  N2 Cs1 Li1 . . . 33.64(2) ?
  N2 Cs1 Li1 . . 1_565 146.19(2) ?
  N2 Cs1 Li1 . . 1_665 92.91(2) ?
  N2 Cs1 N2 1_565 . 2_555 119.55(5) ?
  N2 Cs1 N2 1_565 . 2_665 64.20(5) ?
  N2 Cs1 N2 1_565 . 3_565 55.53(3) ?
  N2 Cs1 N2 1_565 . 3_665 119.55(4) ?
  N2 Cs1 N2 1_565 . 7_665 91.10(4) ?
  N2 Cs1 N2 1_565 . 8_565 60.11(5) ?
  N2 Cs1 N2 1_565 . 9_555 129.21(5) ?
  N2 Cs1 C1 1_565 . . 153.91(4) ?
  N2 Cs1 C1 1_565 . 2_665 62.93(5) ?
  N2 Cs1 C1 1_565 . 3_565 58.71(4) ?
  N2 Cs1 Li1 1_565 . . 146.12(3) ?
  N2 Cs1 Li1 1_565 . 1_565 33.68(3) ?
  N2 Cs1 Li1 1_565 . 1_665 93.25(3) ?
  N2 Cs1 N2 2_555 . 2_665 171.47(4) ?
  N2 Cs1 N2 2_555 . 3_565 64.20(5) ?
  N2 Cs1 N2 2_555 . 3_665 119.55(5) ?
  N2 Cs1 N2 2_555 . 7_665 129.21(4) ?
  N2 Cs1 N2 2_555 . 8_565 91.10(4) ?
  N2 Cs1 N2 2_555 . 9_555 60.11(4) ?
  N2 Cs1 C1 2_555 . . 58.71(5) ?
  N2 Cs1 C1 2_555 . 2_665 153.91(4) ?
  N2 Cs1 C1 2_555 . 3_565 62.93(5) ?
  N2 Cs1 Li1 2_555 . . 33.68(4) ?
  N2 Cs1 Li1 2_555 . 1_565 93.25(4) ?
  N2 Cs1 Li1 2_555 . 1_665 146.12(4) ?
  N2 Cs1 N2 2_665 . 3_565 119.64(5) ?
  N2 Cs1 N2 2_665 . 3_665 55.53(5) ?
  N2 Cs1 N2 2_665 . 7_665 56.18(4) ?
  N2 Cs1 N2 2_665 . 8_565 97.29(4) ?
  N2 Cs1 N2 2_665 . 9_555 124.54(4) ?
  N2 Cs1 C1 2_665 . . 114.25(5) ?
  N2 Cs1 C1 2_665 . 2_665 18.75(4) ?
  N2 Cs1 C1 2_665 . 3_565 117.90(5) ?
  N2 Cs1 Li1 2_665 . . 146.19(4) ?
  N2 Cs1 Li1 2_665 . 1_565 92.91(4) ?
  N2 Cs1 Li1 2_665 . 1_665 33.64(4) ?
  N2 Cs1 N2 3_565 . 3_665 171.47(4) ?
  N2 Cs1 N2 3_565 . 7_665 124.54(4) ?
  N2 Cs1 N2 3_565 . 8_565 56.18(4) ?
  N2 Cs1 N2 3_565 . 9_555 97.29(5) ?
  N2 Cs1 C1 3_565 . . 117.90(4) ?
  N2 Cs1 C1 3_565 . 2_665 114.25(5) ?
  N2 Cs1 C1 3_565 . 3_565 18.75(4) ?
  N2 Cs1 Li1 3_565 . . 92.91(2) ?
  N2 Cs1 Li1 3_565 . 1_565 33.64(2) ?
  N2 Cs1 Li1 3_565 . 1_665 146.19(2) ?
  N2 Cs1 N2 3_665 . 7_665 60.11(4) ?
  N2 Cs1 N2 3_665 . 8_565 129.21(4) ?
  N2 Cs1 N2 3_665 . 9_555 91.10(5) ?
  N2 Cs1 C1 3_665 . . 62.93(4) ?
  N2 Cs1 C1 3_665 . 2_665 58.71(5) ?
  N2 Cs1 C1 3_665 . 3_565 153.91(4) ?
  N2 Cs1 Li1 3_665 . . 93.25(3) ?
  N2 Cs1 Li1 3_665 . 1_565 146.12(3) ?
  N2 Cs1 Li1 3_665 . 1_665 33.68(3) ?
  N2 Cs1 N2 7_665 . 8_565 69.11(4) ?
  N2 Cs1 N2 7_665 . 9_555 69.11(4) ?
  N2 Cs1 C1 7_665 . . 109.78(5) ?
  N2 Cs1 C1 7_665 . 2_665 74.59(4) ?
  N2 Cs1 C1 7_665 . 3_565 141.36(5) ?
  N2 Cs1 Li1 7_665 . . 99.10(3) ?
  N2 Cs1 Li1 7_665 . 1_565 93.52(4) ?
  N2 Cs1 Li1 7_665 . 1_665 33.65(3) ?
  N2 Cs1 N2 8_565 . 9_555 69.11(6) ?
  N2 Cs1 C1 8_565 . . 141.36(4) ?
  N2 Cs1 C1 8_565 . 2_665 109.78(5) ?
  N2 Cs1 C1 8_565 . 3_565 74.59(5) ?
  N2 Cs1 Li1 8_565 . . 93.52(4) ?
  N2 Cs1 Li1 8_565 . 1_565 33.65(4) ?
  N2 Cs1 Li1 8_565 . 1_665 99.10(3) ?
  N2 Cs1 C1 9_555 . . 74.59(4) ?
  N2 Cs1 C1 9_555 . 2_665 141.35(5) ?
  N2 Cs1 C1 9_555 . 3_565 109.78(5) ?
  N2 Cs1 Li1 9_555 . . 33.65(3) ?
  N2 Cs1 Li1 9_555 . 1_565 99.10(4) ?
  N2 Cs1 Li1 9_555 . 1_665 93.52(4) ?
  C1 Cs1 C1 . . 2_665 106.70(5) ?
  C1 Cs1 C1 . . 3_565 106.70(4) ?
  C1 Cs1 Li1 . . . 47.88(3) ?
  C1 Cs1 Li1 . . 1_565 150.94(3) ?
  C1 Cs1 Li1 . . 1_665 95.85(3) ?
  C1 Cs1 C1 2_665 . 3_565 106.70(5) ?
  C1 Cs1 Li1 2_665 . . 150.94(5) ?
  C1 Cs1 Li1 2_665 . 1_565 95.85(5) ?
  C1 Cs1 Li1 2_665 . 1_665 47.88(3) ?
  C1 Cs1 Li1 3_565 . . 95.85(3) ?
  C1 Cs1 Li1 3_565 . 1_565 47.88(3) ?
  C1 Cs1 Li1 3_565 . 1_665 150.94(3) ?
  Li1 Cs1 Li1 . . 1_565 112.976(5) ?
  Li1 Cs1 Li1 . . 1_665 112.976(5) ?
  Li1 Cs1 Li1 1_565 . 1_665 112.976(5) ?
  Cs1 N1 Cs1 . . 10_555 87.25(6) ?
  Cs1 N1 C1 . . . 75.51(12) ?
  Cs1 N1 C1 . . 10_555 160.75(19) ?
  Cs1 N1 C1 10_555 . . 160.75(19) ?
  Cs1 N1 C1 10_555 . 10_555 75.51(12) ?
  C1 N1 C1 . . 10_555 119.9(2) ?
  Cs1 N2 Cs1 1_545 . . 171.47(5) ?
  Cs1 N2 Cs1 1_545 . 7_665 88.90(5) ?
  Cs1 N2 C1 1_545 . . 114.98(15) ?
  Cs1 N2 Li1 1_545 . . 94.28(5) ?
  Cs1 N2 Cs1 . . 7_665 82.71(3) ?
  Cs1 N2 C1 . . . 71.78(13) ?
  Cs1 N2 Li1 . . . 84.95(6) ?
  Cs1 N2 C1 7_665 . . 127.21(10) ?
  Cs1 N2 Li1 7_665 . . 94.76(5) ?
  C1 N2 Li1 . . . 126.71(16) ?
  Cs1 C1 N1 . . . 82.80(14) ?
  Cs1 C1 N2 . . . 89.46(14) ?
  N1 C1 N2 . . . 172.3(2) ?
  Cs1 Li1 Cs1 1_445 . 1_545 112.976(5) ?
  Cs1 Li1 Cs1 1_445 . . 112.976(5) ?
  Cs1 Li1 Cs1 1_445 . 7_555 67.024(5) ?
  Cs1 Li1 Cs1 1_445 . 7_565 67.024(5) ?
  Cs1 Li1 Cs1 1_445 . 7_665 180.0(5) ?
  Cs1 Li1 N2 1_445 . . 128.42(4) ?
  Cs1 Li1 N2 1_445 . 2_555 61.42(4) ?
  Cs1 Li1 N2 1_445 . 3_555 52.04(6) ?
  Cs1 Li1 N2 1_445 . 7_555 51.58(4) ?
  Cs1 Li1 N2 1_445 . 8_555 118.58(4) ?
  Cs1 Li1 N2 1_445 . 9_555 127.96(6) ?
  Cs1 Li1 Cs1 1_545 . . 112.976(5) ?
  Cs1 Li1 Cs1 1_545 . 7_555 67.024(5) ?
  Cs1 Li1 Cs1 1_545 . 7_565 180.0(5) ?
  Cs1 Li1 Cs1 1_545 . 7_665 67.024(5) ?
  Cs1 Li1 N2 1_545 . . 52.04(5) ?
  Cs1 Li1 N2 1_545 . 2_555 128.42(5) ?
  Cs1 Li1 N2 1_545 . 3_555 61.42(6) ?
  Cs1 Li1 N2 1_545 . 7_555 127.96(5) ?
  Cs1 Li1 N2 1_545 . 8_555 51.58(5) ?
  Cs1 Li1 N2 1_545 . 9_555 118.58(6) ?
  Cs1 Li1 Cs1 . . 7_555 180.0(5) ?
  Cs1 Li1 Cs1 . . 7_565 67.024(5) ?
  Cs1 Li1 Cs1 . . 7_665 67.024(5) ?
  Cs1 Li1 N2 . . . 61.42(5) ?
  Cs1 Li1 N2 . . 2_555 52.04(4) ?
  Cs1 Li1 N2 . . 3_555 128.42(4) ?
  Cs1 Li1 N2 . . 7_555 118.58(5) ?
  Cs1 Li1 N2 . . 8_555 127.96(4) ?
  Cs1 Li1 N2 . . 9_555 51.58(4) ?
  Cs1 Li1 Cs1 7_555 . 7_565 112.976(5) ?
  Cs1 Li1 Cs1 7_555 . 7_665 112.976(5) ?
  Cs1 Li1 N2 7_555 . . 118.58(5) ?
  Cs1 Li1 N2 7_555 . 2_555 127.96(4) ?
  Cs1 Li1 N2 7_555 . 3_555 51.58(4) ?
  Cs1 Li1 N2 7_555 . 7_555 61.42(5) ?
  Cs1 Li1 N2 7_555 . 8_555 52.04(4) ?
  Cs1 Li1 N2 7_555 . 9_555 128.42(4) ?
  Cs1 Li1 Cs1 7_565 . 7_665 112.976(5) ?
  Cs1 Li1 N2 7_565 . . 127.96(5) ?
  Cs1 Li1 N2 7_565 . 2_555 51.58(5) ?
  Cs1 Li1 N2 7_565 . 3_555 118.58(6) ?
  Cs1 Li1 N2 7_565 . 7_555 52.04(5) ?
  Cs1 Li1 N2 7_565 . 8_555 128.42(5) ?
  Cs1 Li1 N2 7_565 . 9_555 61.42(6) ?
  Cs1 Li1 N2 7_665 . . 51.58(4) ?
  Cs1 Li1 N2 7_665 . 2_555 118.58(4) ?
  Cs1 Li1 N2 7_665 . 3_555 127.96(6) ?
  Cs1 Li1 N2 7_665 . 7_555 128.42(4) ?
  Cs1 Li1 N2 7_665 . 8_555 61.42(4) ?
  Cs1 Li1 N2 7_665 . 9_555 52.04(6) ?
  N2 Li1 N2 . . 2_555 89.52(6) ?
  N2 Li1 N2 . . 3_555 89.52(6) ?
  N2 Li1 N2 . . 7_555 180.0(5) ?
  N2 Li1 N2 . . 8_555 90.48(6) ?
  N2 Li1 N2 . . 9_555 90.48(6) ?
  N2 Li1 N2 2_555 . 3_555 89.52(7) ?
  N2 Li1 N2 2_555 . 7_555 90.48(6) ?
  N2 Li1 N2 2_555 . 8_555 180.0(5) ?
  N2 Li1 N2 2_555 . 9_555 90.48(7) ?
  N2 Li1 N2 3_555 . 7_555 90.48(6) ?
  N2 Li1 N2 3_555 . 8_555 90.48(7) ?
  N2 Li1 N2 3_555 . 9_555 180.0(5) ?
  N2 Li1 N2 7_555 . 8_555 89.52(6) ?
  N2 Li1 N2 7_555 . 9_555 89.52(6) ?
  N2 Li1 N2 8_555 . 9_555 89.52(7) ?

#=======================================================================

# 11. STRUCTURE-FACTOR LIST

loop_
 _refln_index_h
 _refln_index_k
 _refln_index_l
 _refln_F_squared_calc
 _refln_F_squared_meas
 _refln_F_squared_sigma
 _refln_observed_status
   0   1   0  4802.47  5052.65    51.97 o
  -1   2   0 18575.20 18791.00   145.61 o
   0   2   0 19011.00 20199.10   173.38 o
  -2   3   0  3670.73  3573.16    32.93 o
  -1   3   0  6617.12  6682.91    70.23 o
   0   3   0 24063.20 24836.70   217.02 o
  -3   4   0  2417.25  2338.06    36.10 o
  -2   4   0 37372.70 38791.30   300.34 o
  -1   4   0  3465.80  3391.84    47.61 o
   0   4   0  7463.83  7653.36    85.70 o
  -4   5   0 10526.20 10478.60   101.97 o
  -3   5   0  3107.14  3070.87    42.06 o
  -2   5   0  1894.81  1863.95    36.10 o
  -1   5   0 12848.20 13011.10   134.50 o
   0   5   0  4010.77  4035.77    60.31 o
  -5   6   0  1839.97  1896.08    42.45 o
  -4   6   0  4781.87  4911.01    80.94 o
  -3   6   0 10159.30 10128.70   113.87 o
  -2   6   0  3098.88  3096.26    53.16 o
  -1   6   0  2211.18  2157.54    44.44 o
   0   6   0 13958.00 13651.50   139.66 o
  -6   7   0   922.38   947.84    46.42 o
  -5   7   0  9492.98  9610.55   159.89 o
  -4   7   0  2578.87  2513.03    69.83 o
  -3   7   0  2696.08  2643.17    59.12 o
  -2   7   0  8021.08  8160.02   104.74 o
  -1   7   0  1509.24  1509.25    42.85 o
   0   7   0  1475.86  1496.55    50.39 o
  -7   8   0  4735.26  4736.83   111.49 o
  -6   8   0  1836.56  1827.05    65.86 o
  -5   8   0  1045.92  1050.20    58.32 o
  -4   8   0  9115.92  8946.38   155.92 o
  -3   8   0  1496.59  1543.77    52.77 o
  -2   8   0  1764.61  1777.45    55.94 o
  -1   8   0  4357.74  4277.00    80.14 o
   0   8   0  1685.35  1743.33    80.14 o
  -7   9   0  1597.25  1301.35   131.32 o
  -6   9   0  4091.00  4277.39   110.30 o
  -5   9   0   828.14   923.24    57.53 o
  -4   9   0   864.27   924.83    56.74 o
  -3   9   0  5445.24  5555.33   121.41 o
  -2   9   0  1167.62  1139.87    69.43 o
   0   1   1  2685.56  2729.66    16.27 o
  -1   2   1   903.58   936.73    10.32 o
   0   2   1 19904.30 21320.70   128.55 o
  -2   3   1  2550.20  2505.49    19.44 o
  -1   3   1  2626.16  2558.66    25.00 o
   0   3   1    27.10    33.72     3.97 o
  -3   4   1  2089.45  2026.61    22.61 o
  -2   4   1   127.60   132.91     6.35 o
  -1   4   1  1119.10  1034.33    16.66 o
   0   4   1  5164.22  5199.05    46.02 o
  -4   5   1    24.65    19.04     4.36 o
  -3   5   1  3485.84  3446.20    34.12 o
  -2   5   1  2439.54  2401.55    27.38 o
  -1   5   1     0.79     4.36     4.76 <
   0   5   1  2321.35  2279.35    28.96 o
  -5   6   1  1101.82  1073.22    25.39 o
  -4   6   1  3135.86  3089.51    46.42 o
  -3   6   1    25.31    26.19     6.35 o
  -2   6   1  3582.28  3560.86    40.87 o
  -1   6   1  1430.88  1438.63    25.39 o
   0   6   1     1.29    -1.59     6.74 <
  -6   7   1   879.20   892.69    30.15 o
  -5   7   1    43.07    46.42    11.51 o
  -4   7   1   758.36   801.84    32.14 o
  -3   7   1  1203.50  1232.31    30.15 o
  -2   7   1     5.50     6.74     7.54 <
  -1   7   1  1027.71  1072.42    26.98 o
   0   7   1  1185.91  1204.15    34.52 o
  -7   8   1    28.00    27.38    12.70 <
  -6   8   1  1933.47  1927.43    48.01 o
  -5   8   1   967.79   988.31    38.88 o
  -4   8   1     2.96    -1.98    11.90 <
  -3   8   1   795.84   859.37    30.55 o
  -2   8   1  1447.21  1409.27    38.88 o
  -1   8   1    16.55    17.46    13.49 <
   0   8   1  1105.70  1042.67    45.63 o
  -7   9   1   828.35   764.15    80.14 o
  -6   9   1     1.98    13.49    17.85 <
  -5   9   1  1218.68  1238.27    47.21 o
  -4   9   1   866.54   846.27    37.69 o
  -3   9   1    41.12    45.23    17.46 <
  -2   9   1   873.32   843.50    42.06 o
  -1   9   1   570.92   608.62   121.80 o
   0   0   2  5664.09  5997.71    82.52 o
   0   1   2  2316.42  2264.67    17.06 o
  -1   2   2 14144.60 14935.40    82.52 o
   0   2   2  1801.97  1840.54    15.08 o
  -2   3   2  3819.33  3888.58    27.77 o
  -1   3   2   863.26   804.22    12.70 o
   0   3   2  4917.09  4898.31    36.10 o
  -3   4   2  2771.86  2811.39    25.00 o
  -2   4   2  7400.65  7378.02    53.96 o
  -1   4   2   334.60   331.68    11.51 o
   0   4   2   931.61   927.61    16.27 o
  -4   5   2  5043.10  4978.85    39.68 o
  -3   5   2   796.13   817.31    18.25 o
  -2   5   2   733.34   738.36    16.66 o
  -1   5   2  5192.75  5227.22    49.20 o
   0   5   2   777.72   768.11    19.04 o
  -5   6   2   722.62   729.23    23.01 o
  -4   6   2   609.05   579.66    21.42 o
  -3   6   2  3578.85  3606.88    40.47 o
  -2   6   2  1307.71  1323.17    24.60 o
  -1   6   2  1166.74  1175.58    24.20 o
   0   6   2  2635.69  2619.36    36.90 o
  -6   7   2   314.87   307.09    18.65 o
  -5   7   2  2649.39  2698.32    52.37 o
  -4   7   2   743.76   748.28    31.74 o
  -3   7   2   522.47   526.49    21.03 o
  -2   7   2  2681.47  2686.41    38.09 o
  -1   7   2   745.36   725.26    22.61 o
   0   7   2   278.80   276.14    19.84 o
  -7   8   2  2168.26  2300.77    54.75 o
  -6   8   2   310.83   310.66    23.81 o
  -5   8   2   876.85   812.55    35.31 o
  -4   8   2  2076.26  2086.52    48.80 o
  -3   8   2   101.95   108.71    15.47 o
  -2   8   2   433.54   428.89    21.03 o
  -1   8   2  1600.00  1482.27    42.45 o
   0   8   2   271.99   245.99    26.98 o
  -7   9   2   293.79   194.81    79.35 <
  -6   9   2  1394.81  1363.64    50.78 o
  -5   9   2   640.04   606.64    33.72 o
  -4   9   2   169.47   209.09    24.20 o
  -3   9   2  1708.58  1740.56    48.40 o
  -2   9   2   504.09   482.45    34.91 o
  -1   9   2   175.45   162.67   111.88 <
   0   1   3 23715.50 24390.40   136.09 o
  -1   2   3  1302.17  1398.95    13.49 o
   0   2   3 31952.00 33391.10   178.54 o
  -2   3   3 12358.20 12587.40    71.81 o
  -1   3   3 15515.00 15831.60    96.41 o
   0   3   3   109.71   111.88     5.55 o
  -3   4   3 11542.50 11578.40    67.45 o
  -2   4   3    95.88   104.74     6.74 o
  -1   4   3 15299.80 15481.70    99.98 o
   0   4   3 18676.50 19273.50   121.80 o
  -4   5   3   129.91   153.15     7.94 o
  -3   5   3  9254.06  9098.34    66.26 o
  -2   5   3 10291.00 10185.40    78.16 o
  -1   5   3     3.04    19.44     5.16 o
   0   5   3  6849.94  6849.94    57.93 o
  -5   6   3  7901.65  7996.55    80.94 o
  -4   6   3 10652.00 10619.90    90.06 o
  -3   6   3   138.20   154.73    10.32 o
  -2   6   3 10196.00 10124.70    82.52 o
  -1   6   3  4972.87  4995.91    49.59 o
   0   6   3    13.52    19.04     8.73 <
  -6   7   3  5490.57  5490.27    73.00 o
  -5   7   3     1.78    16.27    10.32 <
  -4   7   3  5601.16  5589.06    78.56 o
  -3   7   3  7038.95  6993.56    71.02 o
  -2   7   3    94.18   111.49    11.11 o
  -1   7   3  6274.02  6249.65    65.07 o
   0   7   3  5587.50  5579.54    76.18 o
  -7   8   3    16.26    19.84    13.89 <
  -6   8   3  4541.40  4462.28    75.78 o
  -5   8   3  3855.86  3853.26    68.64 o
  -4   8   3     1.35    38.49    14.68 <
  -3   8   3  4261.54  4182.97    57.13 o
  -2   8   3  5070.77  4940.37    63.08 o
  -1   8   3   145.58   140.45    19.44 o
   0   8   3  3288.87  3291.86    65.07 o
  -7   9   3  3521.68  3196.24   296.77 o
  -6   9   3    80.96    84.51    22.61 o
  -5   9   3  4081.36  4240.89    76.97 o
  -4   9   3  3712.76  3868.74    72.21 o
  -3   9   3     8.11    -5.55    17.06 <
  -2   9   3  2640.69  2688.00    67.45 o
   0   0   4 11054.70 11825.20   222.18 o
   0   1   4   606.10   545.93     7.54 o
  -1   2   4  3101.78  3078.41    24.20 o
   0   2   4  3342.35  3483.49    28.17 o
  -2   3   4  1690.32  1652.08    16.66 o
  -1   3   4   513.92   489.20     9.52 o
   0   3   4   867.86   814.93    11.51 o
  -3   4   4   893.46   878.01    13.09 o
  -2   4   4  7070.78  7232.81    53.56 o
  -1   4   4   162.10   168.62     7.94 o
   0   4   4  1268.12  1258.90    17.46 o
  -4   5   4  1383.67  1367.21    17.85 o
  -3   5   4   226.67   249.95    10.32 o
  -2   5   4   344.92   367.00    13.09 o
  -1   5   4  1649.51  1592.57    23.41 o
   0   5   4   554.55   536.41    16.66 o
  -5   6   4   648.91   657.82    23.81 o
  -4   6   4   755.88   776.05    24.20 o
  -3   6   4   760.66   791.12    21.42 o
  -2   6   4  1315.08  1286.67    23.41 o
  -1   6   4   298.75   300.74    13.89 o
   0   6   4  1855.56  1824.67    32.93 o
  -6   7   4   185.75   146.40    16.27 o
  -5   7   4  1215.85  1227.55    37.29 o
  -4   7   4   331.58   336.45    23.01 o
  -3   7   4   505.50   489.59    19.44 o
  -2   7   4  1124.25  1145.82    28.57 o
  -1   7   4   187.94   190.44    14.68 o
   0   7   4   142.30   149.18    15.87 o
  -7   8   4   730.64   776.05    37.69 o
  -6   8   4   199.03   207.90    20.63 o
  -5   8   4   168.31   176.55    19.84 o
  -4   8   4  1334.02  1356.10    45.23 o
  -3   8   4    71.26    84.51    14.68 o
  -2   8   4   413.79   415.80    22.61 o
  -1   8   4   347.92   365.41    25.79 o
   0   8   4   210.60   183.30    25.79 o
  -6   9   4   465.32   480.07    36.50 o
  -5   9   4   357.23   347.56    29.36 o
  -4   9   4    89.38    71.81    20.23 o
  -3   9   4   810.98   890.71    42.06 o
  -2   9   4   428.25   386.04    39.28 o
   0   1   5  9100.05  9366.54    59.91 o
  -1   2   5    67.88    87.68     4.76 o
   0   2   5  5704.53  5711.65    40.47 o
  -2   3   5  6242.41  6309.96    42.85 o
  -1   3   5  7905.59  8044.96    52.77 o
   0   3   5     1.02     5.95     2.78 <
  -3   4   5  4411.54  4344.05    33.72 o
  -2   4   5    70.89    94.43     5.55 o
  -1   4   5  5445.58  5395.05    39.68 o
   0   4   5  2589.91  2472.17    24.60 o
  -4   5   5   224.71   224.16     9.52 o
  -3   5   5  4897.99  4792.77    38.49 o
  -2   5   5  4827.65  4801.50    41.66 o
  -1   5   5   194.82   202.34    10.32 o
   0   5   5  3778.49  3650.13    41.66 o
  -5   6   5  4009.59  3861.99    60.31 o
  -4   6   5  2264.13  2171.43    35.71 o
  -3   6   5   177.04   190.84    11.11 o
  -2   6   5  2398.40  2371.00    31.74 o
  -1   6   5  2823.20  2730.06    35.71 o
   0   6   5     1.99    17.46     7.94 <
  -6   7   5  2706.42  2603.10    53.16 o
  -5   7   5     0.00     2.78    10.32 <
  -4   7   5  1505.75  1553.68    42.85 o
  -3   7   5  2617.28  2530.09    37.69 o
  -2   7   5    11.73    24.20     9.13 <
  -1   7   5  1572.93  1611.21    34.12 o
   0   7   5  1314.46  1312.86    41.66 o
  -7   8   5    94.26   131.72    20.23 o
  -6   8   5  1745.48  1730.64    51.58 o
  -5   8   5  1759.58  1790.94    50.78 o
  -4   8   5     6.97    17.85    13.89 <
  -3   8   5  3184.06  3023.26    51.58 o
  -2   8   5  1535.05  1620.74    40.07 o
  -1   8   5    77.05    67.84    18.25 o
   0   8   5  1280.71  1383.48    55.55 o
  -6   9   5    48.00    65.07    57.53 <
  -5   9   5  1198.30  1180.34    48.01 o
  -4   9   5  1327.22  1271.20    49.59 o
  -3   9   5     9.02    40.07    25.79 <
  -2   9   5   922.56   975.61    66.26 o
   0   0   6 37053.40 39556.70   719.31 o
   0   1   6  6019.82  6160.38    45.63 o
  -1   2   6 18315.40 18720.00   110.69 o
   0   2   6  6404.98  6520.63    48.01 o
  -2   3   6  6151.39  6128.64    42.85 o
  -1   3   6  4709.60  4688.43    35.71 o
   0   3   6 18983.70 19404.00   113.07 o
  -3   4   6  5930.76  5861.63    43.64 o
  -2   4   6 14230.80 14180.30    84.11 o
  -1   4   6  2087.94  2094.46    23.01 o
   0   4   6  3858.61  3729.87    32.14 o
  -4   5   6  9719.22  9748.62    75.38 o
  -3   5   6  4087.36  4067.51    38.49 o
  -2   5   6  1512.75  1466.40    22.22 o
  -1   5   6 11457.80 11406.20    83.32 o
   0   5   6  3456.23  3427.15    40.47 o
  -5   6   6   831.87   799.06    31.34 o
  -4   6   6  2718.43  2661.02    40.07 o
  -3   6   6 10501.70 10385.80    80.54 o
  -2   6   6  1970.50  1962.74    29.36 o
  -1   6   6  4963.53  4961.79    53.56 o
   0   6   6  7689.57  7794.61    78.16 o
  -6   7   6   384.66   420.56    25.79 o
  -5   7   6  6669.30  6669.02    90.06 o
  -4   7   6  3488.35  3406.12    56.34 o
  -3   7   6  1586.02  1589.00    31.74 o
  -2   7   6  5625.83  5555.33    64.67 o
  -1   7   6  3074.83  3014.13    45.63 o
   0   7   6  1118.50  1116.86    38.88 o
  -7   8   6  5063.12  5004.64    87.68 o
  -6   8   6  1538.96  1570.35    51.58 o
  -5   8   6  3235.69  3182.75    63.88 o
  -4   8   6  5529.57  5718.00    86.10 o
  -3   8   6   611.70   669.32    32.93 o
  -2   8   6  1056.85  1102.97    35.31 o
  -1   8   6  4738.39  4902.28    82.92 o
   0   8   6  1338.70  1293.02   120.61 o
  -6   9   6  3428.61  3703.69   178.14 o
  -5   9   6   982.52   961.73    71.02 o
  -4   9   6   446.81   538.79    55.94 o
  -3   9   6  4493.71  4621.77   122.60 o
  -2   9   6   880.56   749.86    78.56 o
   0   1   7  1284.03  1220.81    15.08 o
  -1   2   7     0.08    -0.79     2.38 <
   0   2   7  2071.36  2044.07    21.82 o
  -2   3   7   615.22   628.46    11.90 o
  -1   3   7  1609.60  1542.58    18.65 o
   0   3   7    30.87    30.95     3.97 o
  -3   4   7   483.23   487.21    12.30 o
  -2   4   7    53.00    52.77     4.76 o
  -1   4   7  1236.00  1195.02    17.46 o
   0   4   7   627.75   615.36    15.08 o
  -4   5   7   537.72   532.84    15.47 o
  -3   5   7  1128.20  1097.42    19.84 o
  -2   5   7  1156.38  1123.60    20.63 o
  -1   5   7   246.98   238.85    11.90 o
   0   5   7   630.57   637.18    20.23 o
  -5   6   7  1288.99  1311.67    37.29 o
  -4   6   7   554.73   518.95    21.03 o
  -3   6   7   413.96   415.40    19.04 o
  -2   6   7   613.99   616.95    21.03 o
  -1   6   7   272.47   265.43    15.08 o
   0   6   7     0.19    -1.19     8.73 <
  -6   7   7   774.78   817.31    35.71 o
  -5   7   7     3.14    16.27    11.90 <
  -4   7   7    31.16    35.71    11.51 o
  -3   7   7   639.14   603.86    23.41 o
  -2   7   7    80.64    85.30    12.30 o
  -1   7   7   222.40   214.25    17.06 o
   0   7   7   198.77   221.39    20.23 o
  -7   8   7   168.52   176.95    27.38 o
  -6   8   7   525.18   478.09    30.95 o
  -5   8   7   241.41   214.64    21.82 o
  -4   8   7     7.02     2.38    13.89 <
  -3   8   7  1194.58  1153.76    41.66 o
  -2   8   7   421.48   446.35    25.00 o
  -1   8   7   245.55   255.51    28.57 o
   0   8   7   317.65   229.72    96.41 <
  -5   9   7   263.85   286.06    73.80 o
  -4   9   7   273.90   335.26    99.98 o
  -3   9   7    13.96    34.91    53.16 <
   0   0   8  9456.37  9539.53   196.00 o
   0   1   8  2435.66  2352.35    25.39 o
  -1   2   8  8873.07  9118.57    61.10 o
   0   2   8  3074.10  3043.09    29.76 o
  -2   3   8  2253.49  2201.98    23.81 o
  -1   3   8  1901.03  1852.04    23.41 o
   0   3   8  4936.91  4809.04    40.07 o
  -3   4   8  1413.51  1411.25    20.23 o
  -2   4   8  8639.32  8842.43    58.32 o
  -1   4   8  1732.75  1688.58    21.42 o
   0   4   8  1796.97  1746.90    23.41 o
  -4   5   8  4775.54  4615.43    43.25 o
  -3   5   8   982.86  1002.99    21.42 o
  -2   5   8  1794.00  1776.26    25.39 o
  -1   5   8  4599.56  4518.22    48.01 o
   0   5   8  1083.87  1095.04    25.39 o
  -5   6   8  1766.92  1755.23    43.64 o
  -4   6   8  1212.36  1219.22    31.74 o
  -3   6   8  3103.43  3001.44    48.40 o
  -2   6   8  1762.32  1765.15    32.53 o
  -1   6   8   465.97   463.41    19.44 o
   0   6   8  3452.95  3600.53    52.37 o
  -6   7   8  1165.71  1205.34    44.04 o
  -5   7   8  3237.97  3121.26    59.51 o
  -4   7   8   555.13   576.48    25.79 o
  -3   7   8  1109.37  1144.63    35.71 o
  -2   7   8  3435.06  3292.26    49.20 o
  -1   7   8   415.74   408.26    23.01 o
   0   7   8   676.92   655.04    34.91 o
  -7   8   8  1898.20  1977.02    86.89 o
  -6   8   8   489.18   549.50    39.28 o
  -5   8   8   281.07   307.48    26.58 o
  -4   8   8  2634.23  2659.04    65.07 o
  -3   8   8   723.29   743.52    35.71 o
  -2   8   8   804.41   823.66    35.31 o
  -1   8   8  1593.40  1627.48    65.07 o
   0   1   9 11225.00 11383.60    92.05 o
  -1   2   9   255.36   255.11     9.13 o
   0   2   9 15087.30 15429.70   106.73 o
  -2   3   9  7678.18  7739.86    59.12 o
  -1   3   9  8615.90  8767.05    65.07 o
   0   3   9    30.30    36.50     5.16 o
  -3   4   9  7273.57  7343.50    59.51 o
  -2   4   9    39.98    46.42     5.16 o
  -1   4   9  8530.20  8527.01    66.26 o
   0   4   9 11041.30 11071.80    76.18 o
  -4   5   9    21.09    28.57     7.54 o
  -3   5   9  5985.26  5999.70    55.15 o
  -2   5   9  6397.40  6326.23    57.93 o
  -1   5   9    14.34    17.85     6.74 <
   0   5   9  4681.13  4706.68    50.39 o
  -5   6   9  4826.86  4658.67    70.23 o
  -4   6   9  6847.76  7033.64    76.18 o
  -3   6   9    23.93    28.96     9.92 <
  -2   6   9  6625.31  6704.33    70.62 o
  -1   6   9  3471.14  3448.97    45.23 o
   0   6   9     8.03     7.94     9.92 <
  -6   7   9  3539.26  3571.17    66.65 o
  -5   7   9     1.25    -4.36    11.11 <
  -4   7   9  4033.13  4100.84    63.88 o
  -3   7   9  4679.83  4493.23    67.84 o
  -2   7   9    40.42    38.49    13.09 <
  -1   7   9  4356.86  4400.78    63.88 o
   0   7   9  4051.97  4107.98    76.97 o
  -7   8   9     1.01     0.00    47.61 <
  -6   8   9  3089.25  3186.72   103.16 o
  -5   8   9  2714.80  2820.91    67.45 o
  -4   8   9     3.62    18.65    16.66 <
  -3   8   9  2634.21  2664.99    60.31 o
  -2   8   9  3397.55  3459.69    66.26 o
  -1   8   9    50.87    57.13    94.03 <
   0   1  10    29.36    32.53     4.76 o
  -1   2  10   785.67   763.75    16.66 o
   0   2  10   313.22   316.21    11.51 o
  -2   3  10   434.75   400.72    12.30 o
  -1   3  10     6.87    11.90     3.97 <
   0   3  10   156.60   190.84     9.13 o
  -3   4  10   346.32   345.57    13.09 o
  -2   4  10  1502.16  1450.13    21.42 o
  -1   4  10    47.31    43.64     5.16 o
   0   4  10   133.62   136.09     9.52 o
  -4   5  10   340.77   357.47    16.66 o
  -3   5  10    15.60    22.61     6.74 o
  -2   5  10     0.53     7.14     6.74 <
  -1   5  10   497.62   508.24    19.44 o
   0   5  10    88.15    85.30    10.32 o
  -5   6  10    35.13    26.19    11.11 <
  -4   6  10    85.06   104.35    14.28 o
  -3   6  10   192.32   204.33    15.47 o
  -2   6  10   286.15   292.80    20.63 o
  -1   6  10   189.35   203.53    15.87 o
   0   6  10   386.59   434.84    24.20 o
  -6   7  10     8.85    16.66    14.68 <
  -5   7  10   309.21   337.24    25.39 o
  -4   7  10   125.10   135.69    17.06 o
  -3   7  10    49.02    60.70    13.89 o
  -2   7  10   239.81   231.31    19.44 o
  -1   7  10   103.11   108.31    17.85 o
   0   7  10     1.07    -7.94    24.60 <
  -6   8  10    12.66    38.49    42.45 <
  -5   8  10   164.54   184.89    37.69 o
  -4   8  10   294.73   257.10    32.14 o
  -3   8  10    47.56    95.22    26.58 o
  -2   8  10    58.45    91.25    32.53 <
   0   1  11  5241.89  5207.38    52.77 o
  -1   2  11   203.19   192.43    10.32 o
   0   2  11  7172.53  7259.39    60.31 o
  -2   3  11  5098.56  4971.71    46.82 o
  -1   3  11  4547.75  4510.68    44.04 o
   0   3  11     1.63     7.94     4.76 <
  -3   4  11  4046.66  3993.32    40.07 o
  -2   4  11    34.84    39.28     5.55 o
  -1   4  11  2858.68  2873.68    31.34 o
   0   4  11  3926.32  3885.00    40.07 o
  -4   5  11    13.80    10.71     8.33 <
  -3   5  11  4212.87  4210.34    49.59 o
  -2   5  11  3495.04  3534.27    45.63 o
  -1   5  11     2.33     9.13     6.74 <
   0   5  11  3602.91  3622.35    47.21 o
  -5   6  11  2030.70  1994.87    49.20 o
  -4   6  11  3053.88  3069.68    57.13 o
  -3   6  11    69.54    81.73    13.09 o
  -2   6  11  3312.16  3348.59    52.77 o
  -1   6  11  3092.00  3087.93    48.80 o
   0   6  11     2.72    -5.16    11.51 <
  -6   7  11  1666.64  1642.56    53.16 o
  -5   7  11     7.25    -1.59    15.08 <
  -4   7  11  2097.25  2147.62    50.39 o
  -3   7  11  1940.89  2013.92    49.99 o
  -2   7  11    11.52    31.74    13.89 <
  -1   7  11  1740.52  1886.16    59.12 o
   0   7  11  1651.50  1629.46   142.83 o
  -6   8  11  2163.29  2311.88   138.07 o
  -3   8  11  1532.17  1565.59    78.16 o
  -2   8  11  1800.16  1751.66   129.34 o
   0   0  12 23158.00 23247.70   455.87 o
   0   1  12  1803.02  1734.21    26.19 o
  -1   2  12  7241.14  7285.18    67.84 o
   0   2  12  3907.53  3815.18    42.06 o
  -2   3  12  1350.83  1368.00    23.41 o
  -1   3  12  2235.79  2156.35    28.96 o
   0   3  12  8696.99  8710.31    72.61 o
  -3   4  12   967.41   977.20    20.23 o
  -2   4  12 11766.80 11769.30    83.71 o
  -1   4  12  1637.02  1623.91    25.00 o
   0   4  12  2603.66  2580.08    32.53 o
  -4   5  12  4670.34  4658.67    53.96 o
  -3   5  12  1335.62  1376.34    28.57 o
  -2   5  12  1000.64  1012.51    24.60 o
  -1   5  12  5405.68  5317.68    60.31 o
   0   5  12  1639.78  1665.57    33.33 o
  -5   6  12   901.30   919.28    38.09 o
  -4   6  12  1979.82  1971.07    49.59 o
  -3   6  12  4542.82  4547.19    63.88 o
  -2   6  12  1269.09  1291.03    32.93 o
  -1   6  12   892.21   905.39    32.14 o
   0   6  12  6148.74  6050.88    86.10 o
  -6   7  12   541.39   560.61    47.21 o
  -5   7  12  4381.95  4250.02    78.56 o
  -4   7  12  1104.63  1087.50    43.64 o
  -3   7  12  1247.14  1257.71    43.64 o
  -2   7  12  3780.04  3831.44    59.12 o
  -1   7  12   677.65   709.79    56.74 o
  -3   8  12   853.03   832.39   117.44 o
   0   1  13     0.75     4.76     3.97 <
  -1   2  13    68.53    81.33     8.33 o
   0   2  13  1694.77  1710.40    27.38 o
  -2   3  13     0.78     7.94     5.55 <
  -1   3  13     2.65    14.28     6.35 <
   0   3  13    16.39    22.61     7.14 o
  -3   4  13     0.87     2.38     6.74 <
  -2   4  13    29.38    47.61     7.54 o
  -1   4  13    21.28    26.98     7.14 o
   0   4  13   579.84   606.64    19.04 o
  -4   5  13    33.26    38.49     9.52 o
  -3   5  13   162.84   171.79    13.09 o
  -2   5  13    46.68    51.58     9.13 o
  -1   5  13     0.43     4.76     9.52 <
   0   5  13    52.73    64.27    11.11 o
  -5   6  13     0.77    -9.92    13.49 <
  -4   6  13   349.00   338.03    22.61 o
  -3   6  13     1.86    11.90    10.32 <
  -2   6  13   458.32   497.53    23.41 o
  -1   6  13     0.54     0.00    12.70 <
   0   6  13     0.10     9.92    19.04 <
  -6   7  13     1.98     4.36    57.93 <
  -5   7  13    34.31    18.65    27.77 <
  -4   7  13    20.70    32.93    24.20 <
  -3   7  13    17.55    26.98    21.03 <
  -2   7  13    17.95    26.98    23.41 <
  -1   7  13    13.49    26.58    50.78 <
   0   0  14  2780.39  2830.44    92.44 o
   0   1  14  1676.39  1602.48    27.38 o
  -1   2  14  7796.03  7882.29    78.56 o
   0   2  14   745.97   752.64    21.03 o
  -2   3  14  1764.12  1705.24    29.76 o
  -1   3  14  1026.05  1017.67    23.81 o
   0   3  14  4801.93  4825.31    53.56 o
  -3   4  14  1674.58  1679.85    28.96 o
  -2   4  14  3483.38  3479.52    46.42 o
  -1   4  14   920.88   897.06    22.61 o
   0   4  14   592.77   593.15    20.63 o
  -4   5  14  4736.14  4632.88    58.32 o
  -3   5  14   935.63   945.86    26.98 o
  -2   5  14  1125.86  1204.15    30.55 o
  -1   5  14  4356.29  4452.36    61.50 o
   0   5  14   627.76   650.67    25.79 o
  -5   6  14   845.67   908.56    39.68 o
  -4   6  14   440.28   430.48    26.58 o
  -3   6  14  3704.13  3790.97    57.93 o
  -2   6  14   834.11   860.16    33.33 o
  -1   6  14   875.73   846.27    34.91 o
  -3   7  14   505.08   486.42    58.72 o
  -2   7  14  2738.80  2685.62   284.87 o
   0   1  15  4815.91  4781.67    55.55 o
  -1   2  15   111.19   114.26     9.52 o
   0   2  15  4632.20  4582.50    54.75 o
  -2   3  15  3510.26  3535.86    46.82 o
  -1   3  15  3995.98  3979.43    49.99 o
   0   3  15     6.49    17.06     8.33 <
  -3   4  15  3322.27  3305.35    43.64 o
  -2   4  15    20.19    23.41     9.13 <
  -1   4  15  4249.47  4292.47    49.59 o
   0   4  15  4133.45  4071.48    52.77 o
  -4   5  15    18.99    21.42    12.30 <
  -3   5  15  2598.96  2632.46    44.04 o
  -2   5  15  2970.30  3079.60    47.61 o
  -1   5  15     0.01    -9.52    11.51 <
   0   5  15  2130.58  2155.96    45.63 o
  -5   6  15  2643.83  2284.11   138.86 o
  -4   6  15  2902.96  2980.01   106.73 o
  -3   6  15    42.47    36.50    19.44 <
  -2   6  15  2713.68  2668.56    65.46 o
  -1   6  15  1754.48  1669.93    82.92 o
   0   0  16   134.85   123.79    23.81 o
   0   1  16     4.38     3.17     5.16 <
  -1   2  16     2.92     6.35     5.95 <
   0   2  16   110.57   112.68    10.71 o
  -2   3  16    52.29    58.72     9.92 o
  -1   3  16     5.91    15.08     7.14 <
   0   3  16    88.46    75.38    10.71 o
  -3   4  16    26.80    25.79     9.13 <
  -2   4  16   301.78   293.99    17.46 o
  -1   4  16    70.58    80.54    11.90 o
   0   4  16    46.39    68.24    12.70 o
  -4   5  16     9.24    20.63    17.06 <
  -3   5  16    12.58     7.54    12.30 <
  -2   5  16    20.54    18.25    11.90 <
  -1   5  16     0.04     6.35    15.87 <
   0   5  16     6.48    -1.98    32.93 <
  -4   6  16    28.32    21.82    86.89 <
  -3   6  16    32.89    20.23    41.66 <
   0   1  17  3751.79  3764.79    50.39 o
  -1   2  17    29.77    41.26     7.94 o
   0   2  17  2023.75  2069.07    36.10 o
  -2   3  17  3545.39  3556.49    49.99 o
  -1   3  17  3553.92  3611.25    50.78 o
   0   3  17     4.84     1.59     7.54 <
  -3   4  17  2800.26  2769.73    42.85 o
  -2   4  17    13.67    22.61    11.51 <
  -1   4  17  2735.11  2793.54    46.82 o
   0   4  17  1275.64  1303.33    38.49 o
  -4   5  17     1.93    12.70    25.39 <
  -3   5  17  2684.66  2682.45    66.65 o
  -2   5  17  2600.74  2546.36    84.11 o
   0   0  18  3783.91  3768.36   128.15 o
   0   1  18  1028.04  1076.39    26.19 o
  -1   2  18  3295.55  3371.21    49.59 o
   0   2  18   781.23   759.39    26.19 o
  -2   3  18   975.83   966.09    30.15 o
  -1   3  18   879.30   843.89    28.17 o
   0   3  18  3682.87  3658.06    55.55 o
  -3   4  18  1072.89  1039.89    39.68 o
  -2   4  18  2110.70  2102.79    61.50 o
  -1   4  18   562.04   512.60    54.75 o
   0   4  18   627.85   518.95   122.20 o
   0   1  19    24.77    27.38    11.11 <
  -1   2  19     0.64     0.00    13.09 <
   0   2  19     0.48    -4.36    21.03 <
  -2   3  19    67.08    90.86    54.36 <
  -1   3  19     1.44   -28.57    39.68 <
   0   3  19     7.37    21.03    57.93 <
